# Supplementary material for: The primary photo-dissociation dynamics of carboxylate anions in aqueous solution: decarboxylation
Source: Royal Society of Chemistry journal article supplement (doi:10.1039/c8cp07621a), 2019-01-01
Supplement: c8cp07621a1.pdf [file c8cp07621a1.pdf]

### Perturbed free induction decay signal from ambient $\text{CO}_2(\text{g})$ .

The perturbed free induction (PFID) signal is common in UV pump - IR probe transient absorption spectroscopy of liquids. The PFID signal usually pertains to vibrations in solvent and solute.<sup>51</sup> When probing in the spectral range around  $2350\text{ cm}^{-1}$  an additional PFID signal arises from the asymmetric stretch vibration of ambient gas-phase  $\text{CO}_2$ .

The short probe pulse excites the  $\text{CO}_2(\text{g})$  molecules as it propagates through air, thereby inducing a coherent polarization of the  $\text{CO}_2(\text{g})$  molecules. This polarization dephases during the free induction decay with a dephasing time  $T_2$ , which for  $\text{CO}_2(\text{g})$  is many picoseconds. The infrared detector records the coherent sum of the infrared light of the probe pulse and the infrared light emitted by the decaying polarization pertaining to the  $\text{CO}_2(\text{g})$  molecules. If the system consisting of the probe pulse and the  $\text{CO}_2(\text{g})$  molecules is left alone during the free induction decay, the detector measures no induced absorption change. However, if the pump pulse interrupts the light emission during the free induction decay of the  $\text{CO}_2(\text{g})$  molecules or changes the transmission through the liquid sample within  $\sim T_2$  after the probe pulse, the detector records an induced absorption change at times  $t < 0$  – the perturbed free induction decay signal. In reality, the PFID signal persists for as long as there is a temporal overlap between the pump and the probe pulse, and PFID may thus be observed slightly after  $t = 0$ .

Fig. S1 below shows the raw data recorded in aqueous acetate. The figure shows an enormous  $t = 0$  coherence signal preceded by a strong (and in this graph under-sampled) PFID signal. These signals are much stronger than the transient absorption pertaining to the photolysis of acetate, and small remnants of the signals persist 2 ps after  $t = 0$  because of the finite width of Gaussian pump and probe pulses.

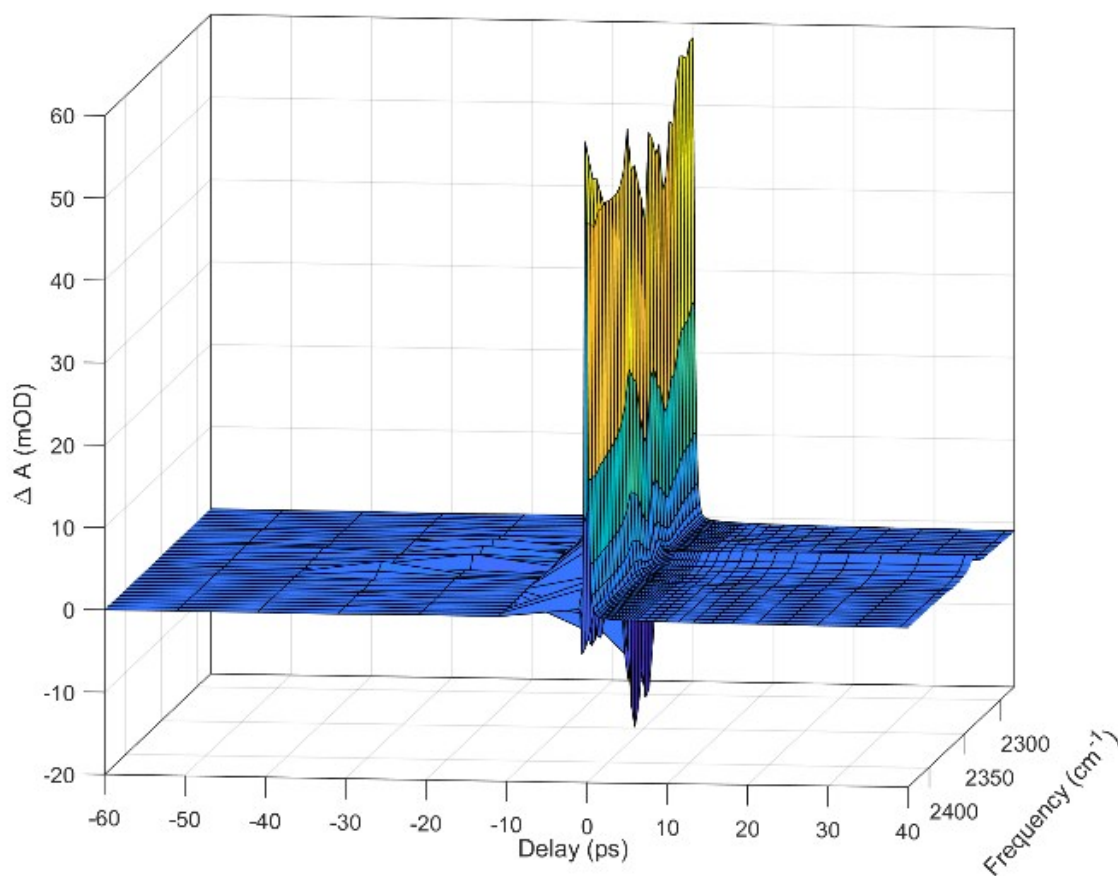

Fig. S1. Raw data recorded in aqueous acetate showing (under-sampled) PFID signal at  $t < 0$  and the coherence signal at  $t = 0$  together with the induced absorption associated with aqueous  $\text{CO}_2(\text{aq})$  at  $t > 0$ .

The origin of the  $t = 0$  coherence signal and the PFID signal is clearly demonstrated in data recorded in neat water, shown in Fig. S2-S6 below. Note that these data lack the induced absorption pertaining to the asymmetric stretch of

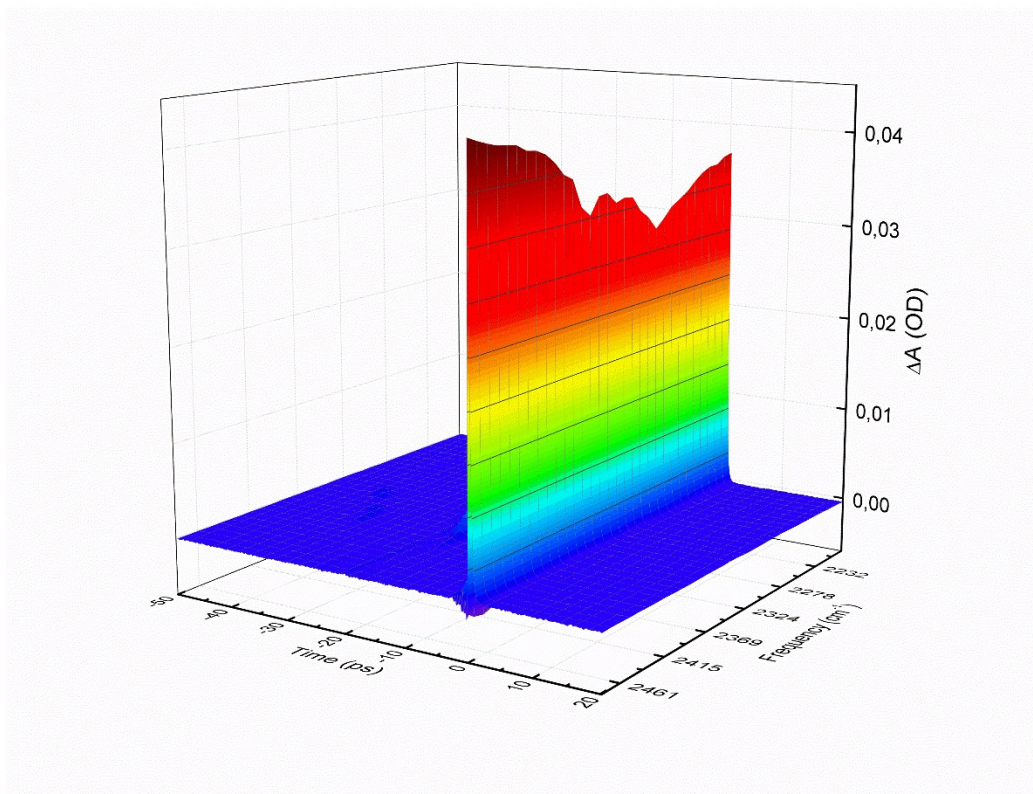

$\text{CO}_2(\text{aq})$  observed in the photolysis of acetate.

Fig. S2. The  $t = 0$  coherence signal and the PFID signal recorded in neat water.

Fig. S3. Close-up of the  $t = 0$  coherence signal and the PFID signal recorded in neat water. Since the PFID signal related  $\text{CO}_2(\text{g})$  and the coherence signal are strong and the Gaussian pump and probe pulses have a FWHM cross-correlation of about 0.3 ps the  $t = 0$  coherence signal and the PFID signal are detectable for 2 ps after  $t = 0$ . That is, until the temporal overlap between pump and probe pulses becomes insignificant. The graph is truncated at  $\Delta A = 0.0045$  OD.

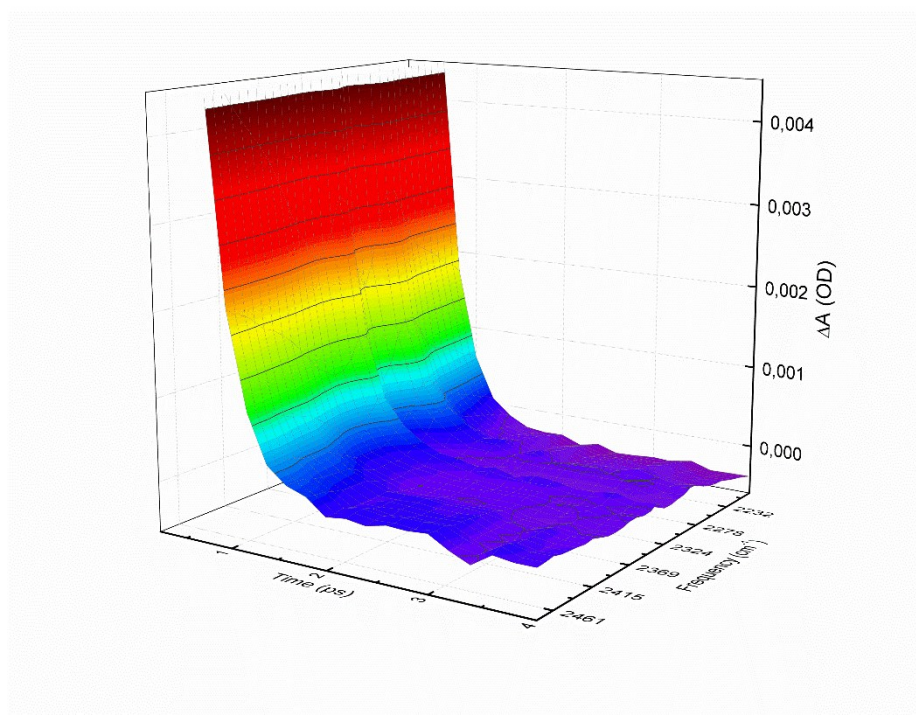



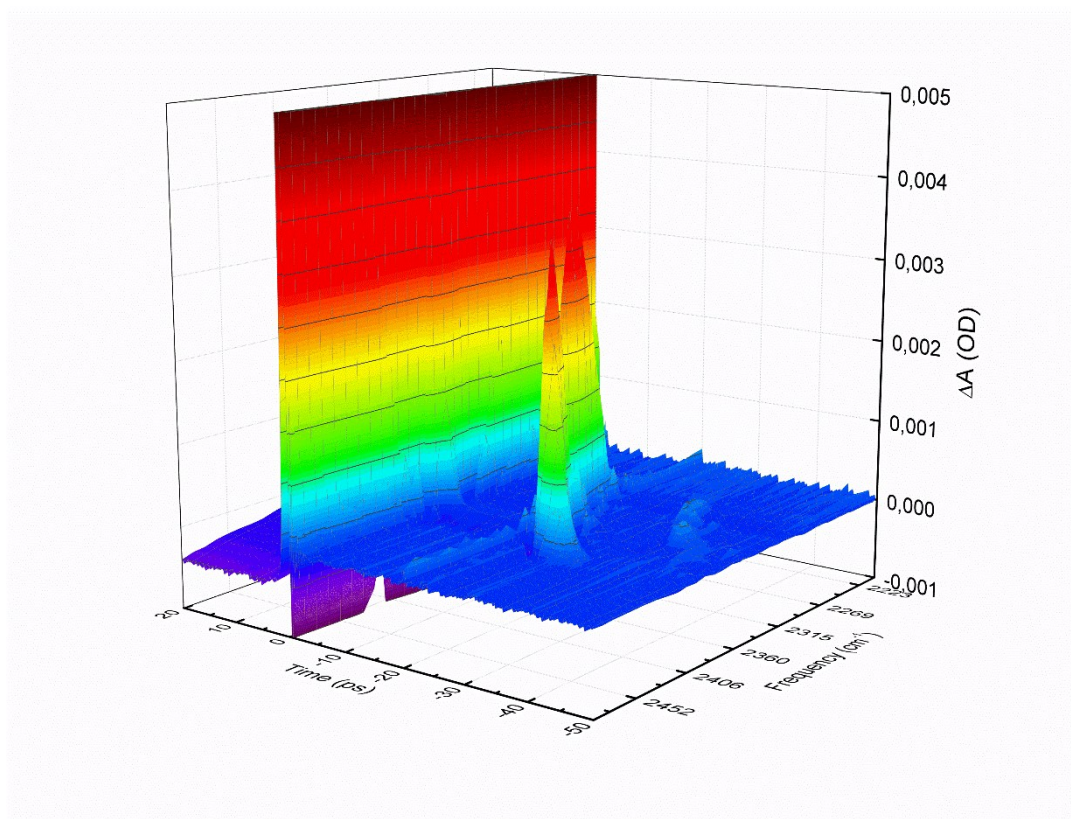

Fig. S4. The  $t = 0$  coherence signal and the PFID signal recorded in neat water. Note the significant PFID signal from  $\text{CO}_2(\text{g})$  appears already at  $t = -40$  ps. The graph is truncated at  $\Delta A = 0.005$  OD.

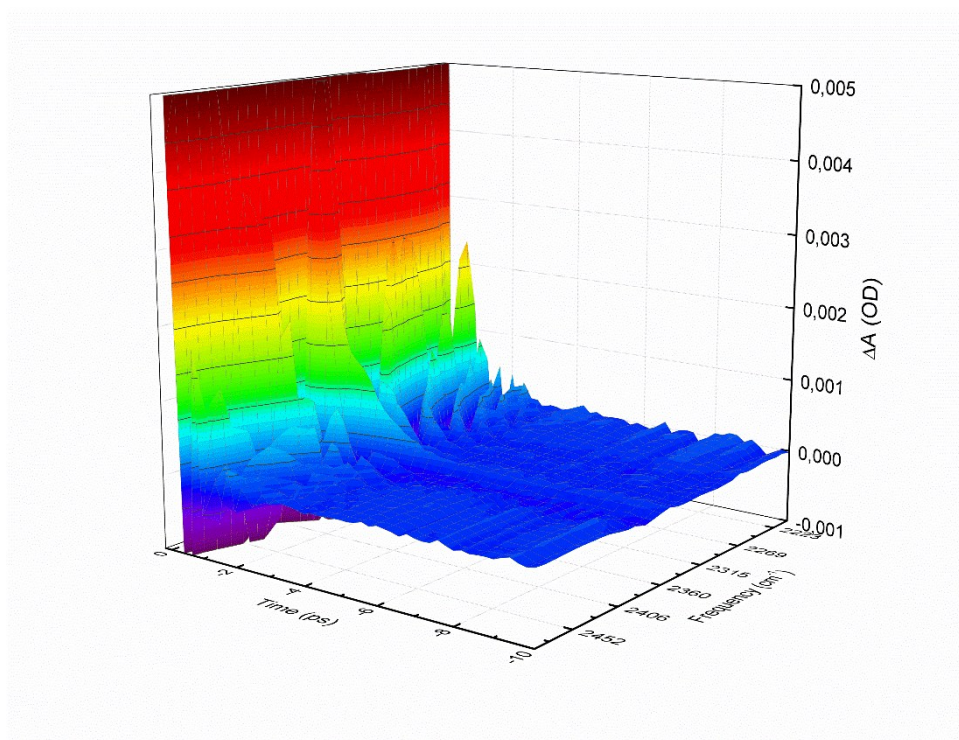

Fig. S5. The last  $-10$  ps of the  $t = 0$  coherence signal and the PFID signal recorded in neat water. The graph is truncated at  $\Delta A = 0.005$  OD.

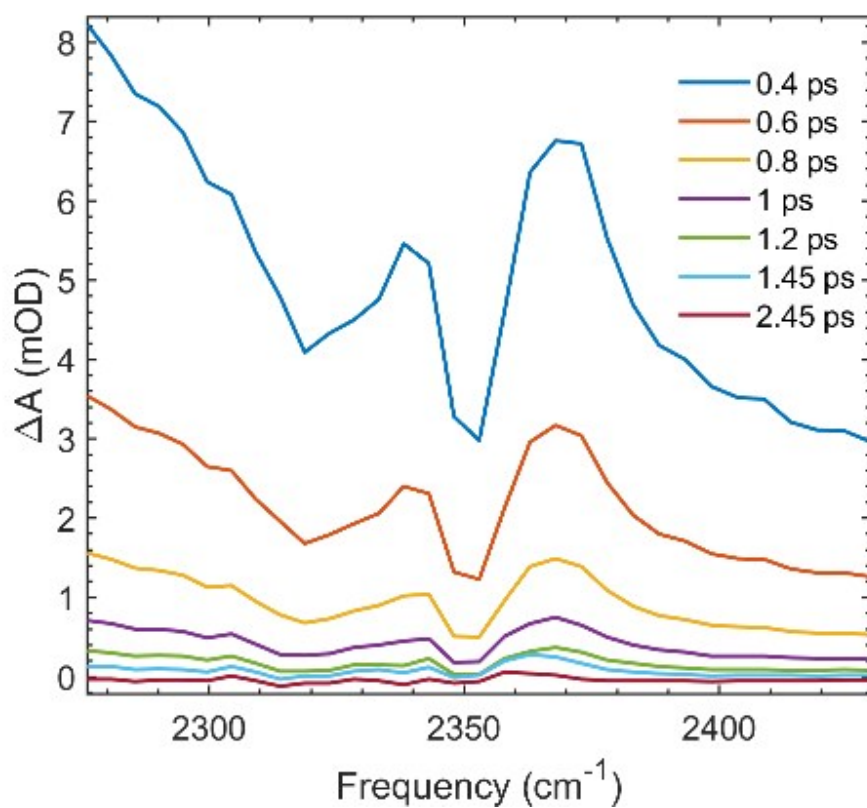

Fig. S6. The coherence signal and PFID signal recorded in neat water shown at selected times at  $t > 0$ . The data representation is similar to that of Fig. 2 and Fig. 3 in the manuscript.

References:

S1. P. Hamm. *Chem. Phys.* , 1995, **200**, 415.
